# Supplementary material
Source: MDPI journal article supplement (https://www.mdpi.com/2073-4344/12/12/1622)
Supplement: s1 [file s1 › catalysts-2069491-supplementary.pdf]

# Selective oxidation of alcohols and alkenes with molecular oxygen catalyzed by highly dispersed Cobalt (II) decorated 12-tungstosilicic acid-modified zirconia

Soyeb Pathan<sup>1,2,3\*</sup>, Anjali Patel<sup>2\*</sup>, Harshita Tilani<sup>3</sup>

<sup>1</sup>Centre of Research for Development (CR4D), Parul Institute of Applied Sciences, Parul University, Vadodara-391760, India

<sup>2</sup>Polyoxometalates and Catalysis Laboratory, Department of Chemistry, Faculty of Science, The Maharaja Sayajirao University of Baroda, Vadodara- 390002, Gujarat, India

<sup>3</sup>Department of Chemistry, Parul Institute of Applied Sciences, Parul University, Vadodara-391760, India

\*Correspondence: khan\_9751@yahoo.com (S.P.); anjali.patel-chem@msubaroda.ac.in (A.P.)

**Table S1.** Effect of Solvent on oxidation of benzyl alcohol over Co/TSA-ZrO<sub>2</sub>.

| Sr. | Solvent      | % Conversion | % Selectivity |              |
|-----|--------------|--------------|---------------|--------------|
|     |              |              | Benzaldehyde  | Benzoic acid |
| 1.  | Water        | 21.9         | 38            | 62           |
| 2.  | Hexane       | 36.9         | >94           | 6            |
| 3   | Toluene      | 43.0         | >94           | 6            |
| 4.  | Solvent-free | 41           | >90           | 10           |

Conversion is based on benzyl alcohol<sup>a</sup> (100 mmol); temperature (90 °C); O<sub>2</sub> balloon 1 atm; amount of Co/TSA-ZrO<sub>2</sub> (100 mg); time (24 h).
